# Supplementary material
Source: PubMed Central journal article supplement (PMC5591066)
Supplement: NIHMS877887-supplement-supplement_1.pdf [file NIHMS877887-supplement-supplement_1.pdf]

**Supplemental Digital Content**

Physiologically-Based Pharmacokinetic Modeling for Predicting the Effect of Intrinsic and Extrinsic Factors on Darunavir or Lopinavir Exposure Co-administered with Ritonavir

Christian Wagner, Ph.D.<sup>a,d</sup>, Ping Zhao, Ph.D.<sup>b</sup>, Vikram Arya, Ph.D., FCP<sup>a</sup>, Charu Mullick, M.D.<sup>c</sup>, Kimberly Struble, Pharm.D.<sup>c</sup>, Stanley Au, Pharm.D., BCPS<sup>a</sup>

**Supplemental Table 1 (S1).** PBPK model input parameters for LPV, DRV, and RTV.

| Parameter           | LPV                       | DRV                     | RTV <sup>10</sup>    |
|---------------------|---------------------------|-------------------------|----------------------|
| MW                  | 628.8 <sup>1</sup>        | 547.7 <sup>2</sup>      | 721.0                |
| Log P               | 4.2 (pred <sup>A</sup> )  | 2.5 <sup>3</sup>        | 3.9                  |
| pKa                 | Neutral <sup>1</sup>      | Neutral <sup>B,4</sup>  | 1.8 (b); 2.8 (b)     |
| fu                  | 0.01 <sup>1</sup>         | 0.05 <sup>2</sup>       | 0.02                 |
| B/P                 | 0.75 (pred <sup>C</sup> ) | 0.65 <sup>D,5</sup>     | 0.58                 |
| <b>Absorption</b>   |                           |                         |                      |
| fa                  | 1 <sup>E,6</sup>          | 1 <sup>E,2</sup>        | 1                    |
| [1/h]               | 0.57 <sup>7</sup>         | 1.04 <sup>8</sup>       | 0.22                 |
| <b>Distribution</b> |                           |                         |                      |
| PBPK model          | minimal                   | minimal                 | minimal              |
| Vss [L/kg]          | 0.82 (pred <sup>C</sup> ) | 1.7 <sup>F,9</sup>      | 0.40 (pred)          |
| Kp scalar           | 0.098 <sup>G</sup>        | 1 (default)             | 0.048                |
| <b>Elimination</b>  |                           |                         |                      |
| CYP2D6              |                           |                         | Vmax: 0.7; Km: 1     |
| CYP3A4              | CLint: 93.4 <sup>H</sup>  | CLint: 182 <sup>I</sup> | Vmax: 1.37; Km: 0.07 |

|               |                   |                                |                   |
|---------------|-------------------|--------------------------------|-------------------|
| CYP3A5        |                   |                                | Vmax: 1; Km: 0.05 |
| CLr           | 0.15 <sup>6</sup> | 0.30 <sup>1</sup>              | 0.27              |
| Additional CL |                   | Systemic: 6.5 L/h <sup>1</sup> | HLM: 50           |

### Interaction - Inhibition

|         |                                    |                      |                          |
|---------|------------------------------------|----------------------|--------------------------|
| CYP2B6  |                                    | Ki: 500 <sup>2</sup> | Ki: 1.3                  |
| CYP2C9  |                                    | Ki: 52 <sup>2</sup>  | Ki: 1.22                 |
| CYP2C19 |                                    | Ki: 25 <sup>2</sup>  |                          |
| CYP2D6  |                                    | Ki: 41 <sup>2</sup>  | Ki: 0.06                 |
| CYP3A4  | Kapp: 0.41; Kinact: 1 <sup>J</sup> | Ki: 0.4 <sup>2</sup> | Kapp: 0.25; Kinact: 19.8 |
| CYP3A5  | Kapp: 1; Kinact: 1 <sup>J</sup>    | Ki: 0.4 <sup>2</sup> | Kapp: 0.25; Kinact: 19.8 |

### Interaction - Induction

|        |  |  |                         |
|--------|--|--|-------------------------|
| CYP3A4 |  |  | Indmax: 68.5; IndC50: 1 |
| CYP3A5 |  |  | Indmax: 68.5; IndC50: 1 |

*B* base/basic, *B/P* blood:plasma partition ratio, *CL* clearance, *CL<sub>int</sub>* intrinsic clearance [ $\mu\text{L}/\text{min}/\text{mg}$  protein], *CL<sub>r</sub>* renal clearance [ $\text{L}/\text{h}$ ], *CYP* cytochrome P450, *DRV* darunavir, *fa* fraction absorbed, *fu* fraction of unbound drug in plasma, *HLM* human liver microsomes, *IndC50* inducer concentration that yields half-maximal induction [ $\mu\text{mol}/\text{L}$ ], *Indmax* maximum fold induction, *ka* absorption rate constant [ $\text{h}^{-1}$ ], *Kapp* concentration of mechanism-based inhibitor associated with half-maximal inactivation rate [ $\mu\text{mol}/\text{L}$ ], *Ki* inhibitor concentration that yields half-maximal inhibition [ $\mu\text{mol}/\text{L}$ ], *Kinact* inactivation rate of given enzyme [ $\text{h}^{-1}$ ], *Km* Michaelis-Menten constant [ $\mu\text{mol}/\text{L}$ ], *Kp* partition coefficient, *log P* logarithm of octanol-water partition coefficient, *LPV* lopinavir, *MW* molecular weight [ $\text{g}/\text{mol}$ ], *PBPK* physiologically-based pharmacokinetic, *pKa* negative decadal logarithm of acid dissociation constant, *pred* predicted, *RTV* ritonavir, *Vmax* maximum rate of metabolite formation [ $\text{pmol}/\text{min}/\text{mg}$  microsomal protein], *Vss* volume of distribution at steady state [ $\text{L}/\text{kg}$ ]

1  
2  
3  
4 A GastroPlus™ (v.8) prediction, based on the molecular structure of lopinavir.  
5  
6

7 B pKa of 2.4 (basic) and 13.6 (acidic) indicates the molecule is not ionized at the physiologically  
8 relevant pH range  
9  
10

11  
12 C Simcyp® prediction, based on the physicochemical properties of the drug.  
13  
14

15  
16 D Based on range of mean blood to plasma concentration ratio of total radioactivity ranging from  
17 0.59 to 0.70 with darunavir/ritonavir  
18

19  
20 E Based on absolute darunavir/ritonavir bioavailability of 82% and 20% of oral lopinavir  
21 recovered unchanged in the feces.  
22  
23

24  
25 F The V<sub>ss</sub> predicted from the physicochemical properties of DRV (0.7 L/kg) over-predicted  
26 boosted DRV C<sub>max</sub>, and underpredicted C<sub>min</sub>. Therefore, a V<sub>ss</sub> of 1.7 L/kg, which derives from  
27 intravenous administration of boosted DRV<sup>9</sup>, was applied to the model.  
28  
29  
30

31  
32 G The Parameter Estimation Tool provided within the software was used to fit the K<sub>p</sub> scalar to  
33 observed data following oral administration of 400 mg of unboosted LPV<sup>1</sup>.  
34  
35  
36

37  
38 H Calculated from the observed apparent clearance following oral administration of single doses  
39 of 400 mg and 800 mg of unboosted LPV<sup>1</sup>. The intrinsic clearance LPV was calculated using  
40 Simcyp®'s retrograde model.  
41  
42  
43

44  
45 I Clearance of unboosted DRV was described using data based on intravenous infusion of 150  
46 mg unboosted DRV<sup>2</sup>. From a variety of CYP enzymes, only CYP3A4 shows activity towards  
47 DRV<sup>2</sup>. Therefore, initially, based on minimal real clearance<sup>2</sup>, we assigned 98.8% of total drug  
48 elimination to CYP3A4, and 1.2% to renal elimination.  
49  
50  
51

52  
53 Preliminary simulations using this model showed an approximately 10-fold over-prediction of the  
54 effect of RTV on the exposure of DRV (data not shown). Subsequent refinement of the DRV  
55  
56  
57  
58  
59  
60

1  
2  
3  
4 PBPK model, compared with the multiple dose pharmacokinetics of boosted DRV and DRV-  
5  
6 ketoconazole interaction data<sup>11</sup>, included a stepwise reduction of the fm (CYP3A4) from 98.8%  
7  
8 (initial PBPK model) to 85%, 80%, 75%, 70%, and 60%, with additional non-CYP clearances of  
9  
10 0%, 13.8%, 18.8%, 23.8%, 28.8%, and 38.8%. For all these DRV PBPK models, renal  
11  
12 elimination accounted for 1.2% of total elimination (see note 5).  
13  
14

15  
16 The DRV PBPK model constituting of a fm (CYP3A4) of 75% (182  $\mu\text{L}/\text{min}/\text{mg}$  protein), an  
17  
18 additional non-CYP clearance of 23.8% (6.5 L/h), and a renal clearance of 1.2% (0.3 L/h),  
19  
20 yielded best simulation results, and was subsequently used for all further simulations.  
21  
22

23 J Considering mechanism-based inhibition of CYP3A4 ( $K_{\text{app}} = 0.41 \mu\text{mol}/\text{L}$ ;  $k_{\text{inact}} = 6 \text{ h}^{-1}$ ) and  
24  
25 CYP3A5 ( $K_{\text{app}} = 1 \mu\text{mol}/\text{L}$ ;  $k_{\text{inact}} = 3 \text{ h}^{-1}$ ) by unboosted LPV<sup>12</sup> yielded predicted LPV steady-  
26  
27 state plasma concentrations exceeding those of boosted LPV (data not shown). To account for  
28  
29 the obvious over-prediction of mechanism-based inhibition by recombinant CYP3A4 and  
30  
31 CYP3A5, and since no other data are available, the inhibition potency of unboosted LPV was  
32  
33 “arbitrarily” decreased in a stepwise manner, with  $k_{\text{inact}}$  values of  $6 \text{ h}^{-1}$  (initial value)<sup>12</sup>,  $4 \text{ h}^{-1}$ ,  
34  
35  $2 \text{ h}^{-1}$ ,  $1 \text{ h}^{-1}$ , and  $0.5 \text{ h}^{-1}$  for both CYP3A4 and CYP3A5. Between  $k_{\text{inact}}$  values of  $4 \text{ h}^{-1}$  and  $2 \text{ h}^{-1}$ ,  
36  
37 the model was very sensitive, and the predicted oral clearance of LPV under steady state  
38  
39 conditions was increased markedly. However, at  $k_{\text{inact}}$  values of  $\leq 1 \text{ h}^{-1}$ , sensitivity of the model  
40  
41 towards  $k_{\text{inact}}$  was decreased, and a further reduction of  $k_{\text{inact}}$  had no substantial impact on  
42  
43 the predicted exposure of unboosted LPV under steady state conditions. Therefore, we used a  
44  
45  $k_{\text{inact}}$  value of  $1 \text{ h}^{-1}$  for all further simulations. Since LPV is always administered with RTV, and  
46  
47 RTV is a much stronger mechanism-based inhibitor compared to LPV ( $k_{\text{inact}_{\text{RTV}}} = 19.8 \text{ h}^{-1}$ ,  
48  
49  $k_{\text{inact}_{\text{LPV}}} = 6 \text{ h}^{-1}$ <sup>12</sup>), it is highly likely that the DDI potential of the LPV/RTV combination is  
50  
51 attributed to the characteristics of RTV rather than LPV.  
52  
53  
54  
55  
56  
57  
58  
59  
60

## References for Supplemental Digital Content

1. U.S. Food and Drug Administration. New Drug Application 21226 (lopinavir/ritonavir): clinical pharmacology review, September 15, 2000. Available at: <http://www.accessdata.fda.gov>.
2. U.S. Food and Drug Administration. New Drug Application 21976 (darunavir): clinical pharmacology review, June 23, 2006. Available at: <http://www.accessdata.fda.gov>.
3. European Medicines Agency. Scientific discussion, darunavir/ritonavir 2006. Available at: [http://www.ema.europa.eu/docs/en\\_GB/document\\_library/EPAR\\_-\\_Scientific\\_Discussion/human/000707/WC500041754.pdf](http://www.ema.europa.eu/docs/en_GB/document_library/EPAR_-_Scientific_Discussion/human/000707/WC500041754.pdf).
4. DrugBank, darunavir. Available at <http://www.drugbank.ca/drugs/DB01264>
5. Vermeir M, Lachau-Durand S, Mannens G, et al. Absorption, metabolism, and excretion of darunavir, a new protease inhibitor, administered alone and with low-dose ritonavir in healthy subjects. *Drug Metab Dispos.* 2009; Apr;37(4):809-20.
6. European Medicines Agency. Scientific discussion, lopinavir/ritonavir. 2005. Available at: [http://www.ema.europa.eu/docs/en\\_GB/document\\_library/EPAR\\_-\\_Scientific\\_Discussion/human/000368/WC500039040.pdf](http://www.ema.europa.eu/docs/en_GB/document_library/EPAR_-_Scientific_Discussion/human/000368/WC500039040.pdf).
7. Dickinson L, Boffito M, Back D, et.al. Sequential population pharmacokinetic modeling of lopinavir and ritonavir in healthy volunteers and assessment of different dosing strategies. *Antimicrob Agents Chemother.* 2011; Jun;55(6):2775-82.
8. Arab-Alameddine M, Lubomirov R, Fayet-Mello A, et al. Population pharmacokinetic modelling and evaluation of different dosage regimens for darunavir and ritonavir in HIV-infected individuals. *J. Antimicrob Chemother.* 2014;69:2489-98
9. McKeage K, Perry CM, Keam SJ. Darunavir: a review of its use in the management of HIV infection in adults. *Drugs.* 2009;69(4):477-503.

1  
2  
3  
4  
5  
6  
7  
8  
9  
10  
11  
12  
13  
14  
15  
16  
17  
18  
19  
20  
21  
22  
23  
24  
25  
26  
27  
28  
29  
30  
31  
32  
33  
34  
35  
36  
37  
38  
39  
40  
41  
42  
43  
44  
45  
46  
47  
48  
49  
50  
51  
52  
53  
54  
55  
56  
57  
58  
59  
60

10. Simcyp's compound library (v14), Simcyp Limited.

11. Sekar VJ, Lefebvre E, De Pauw M, et al. Pharmacokinetics of darunavir/ritonavir and ketoconazole following co-administration in HIV-healthy volunteers. *Br J Clin Pharmacol.* 2008; Aug;66(2):215-21.

12. Ernest CS, Hall SD, Jones DR. Mechanism-based inactivation of CYP3A by HIV protease inhibitors. *J Pharmacol Exp Ther.* 2005; Feb;312(2):583-91.

For Peer Review

This is the accepted version of the following article: Wagner, C., Zhao, P., Arya, V., Mullick, C., Struble, K. and Au, S. (2017), Physiologically Based Pharmacokinetic Modeling for Predicting the Effect of Intrinsic and Extrinsic Factors on Darunavir or Lopinavir Exposure Coadministered With Ritonavir. *The Journal of Clinical Pharmacology*. doi:10.1002/jcph.936, which has been published in final form at <http://onlinelibrary.wiley.com/doi/10.1002/jcph.936/full>. This article may be used for non-commercial purposes in accordance with the Wiley Self-Archiving Policy [ <http://olabout.wiley.com/WileyCDNSection/id-828039.html> ].
